# Supplementary material
Source: PubMed Central journal article supplement (PMC1635392)

Actin      FLAG-tagged  
MT1-MMP      Biotin-COL      Merged

Non-transfected  
COS1

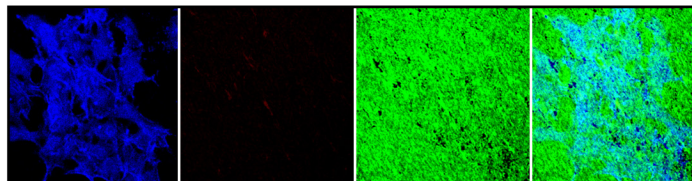

Transfected COS1  
With FLAG-MT1-MMP  
(wild type)

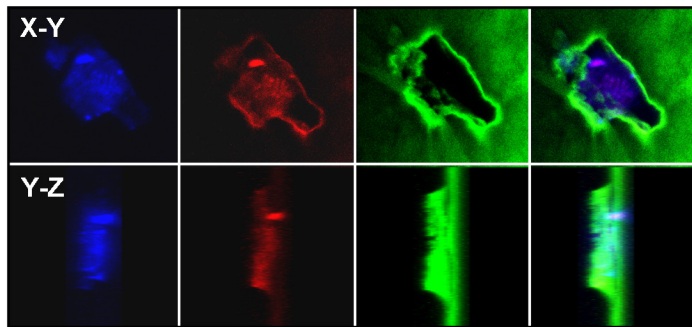

Transfected COS1  
With FLAG-MT1-MMP  
(E240A mutant)

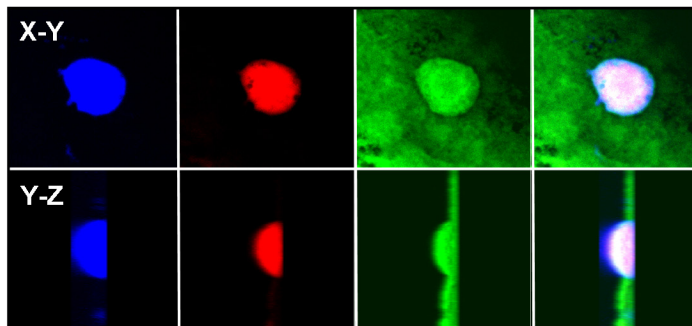

Supplement: mbc_E06-06-0486_1.pdf [file mbc_E06-06-0486_1.pdf]
