# Supplementary material
Source: PubMed Central journal article supplement (PMC1635392)

Actin

Biotin-COL

Actin & Collagen  
Merged

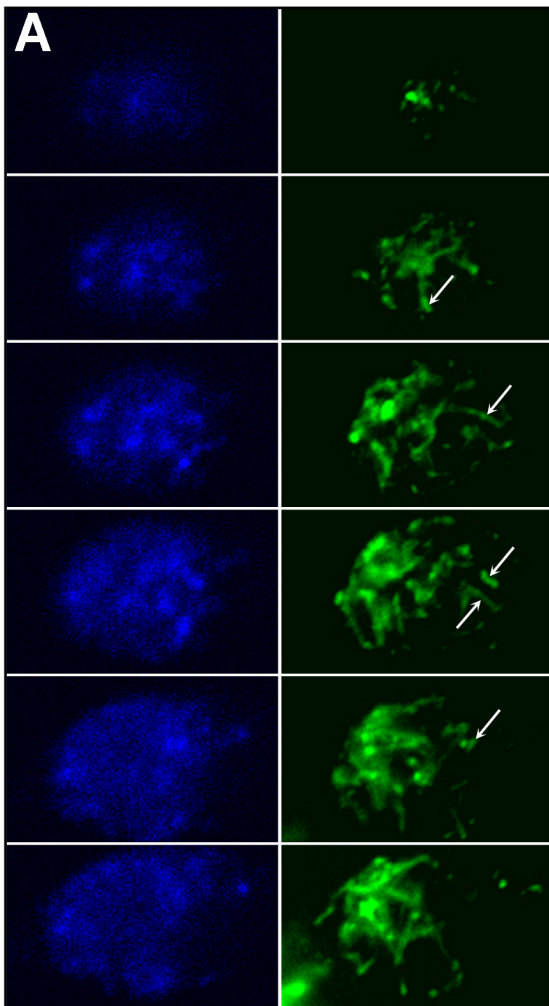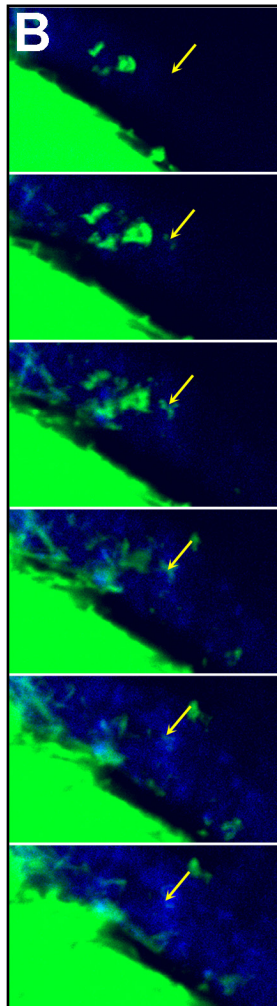

Supplement: mbc_E06-06-0486_2.pdf [file mbc_E06-06-0486_2.pdf]
